# Supplementary material
Source: Springer Nature journal article supplement (https://www.springermedizin.de/resource/supplementary/12931_2012_1336_MOESM7_ESM.pdf/9426062)

# TLR3 mRNA

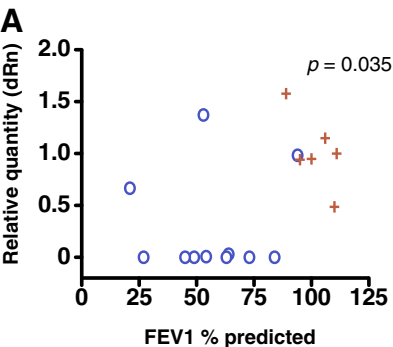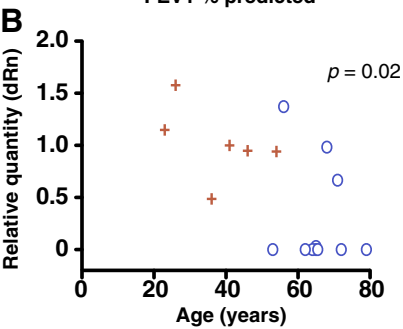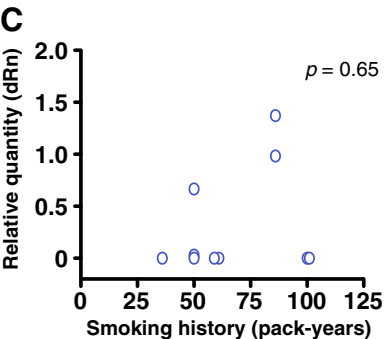

# TLR3 protein

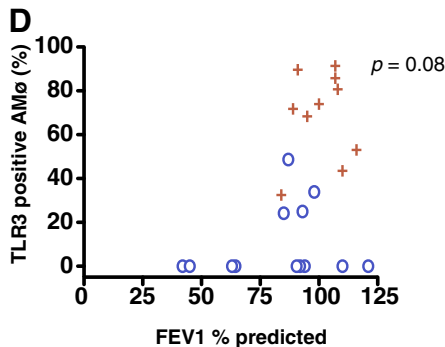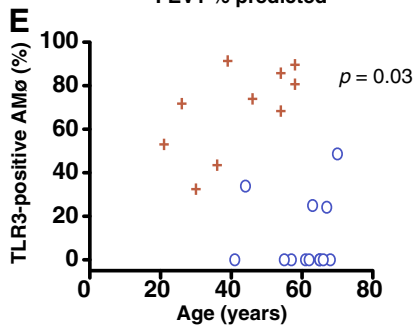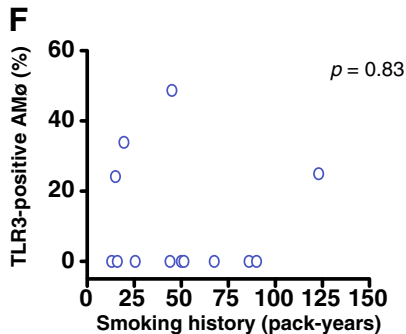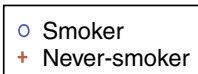

Supplement: MOESM7 [file 9426062]
